# Supplementary material for: Phase III placebo-controlled, double-blind, randomized trial of pegfilgrastim to reduce the risk of febrile neutropenia in breast cancer patients receiving docetaxel/cyclophosphamide chemotherapy
Source: Springer Nature journal article supplement (doi:10.1007/s00520-014-2597-1), 2015-01-09
Supplement: MOESM1 [file 8575360]

Phase III placebo-controlled double-blind randomized trial of pegfilgrastim to reduce the risk of febrile neutropenia in breast cancer patients receiving docetaxel/cyclophosphamide chemotherapy

*Supportive Care in Cancer*

Y. Kosaka, Y. Rai, N. Masuda, T. Takano, T. Saeki, S. Nakamura, R. Shimazaki, Y. Ito, Y. Tokuda, K. Tamura

**Corresponding Author:** Yoshimasa Kosaka, Kitasato University School of Medicine, Sagami-hara, Japan;

E-mail: y-kosaka@med.kitasato-u.ac.jp

**Online Resource 1** Hematologic adverse events

| Event/Grade <sup>a</sup> | First chemotherapy cycle |   |           |    | All chemotherapy cycles |    |           |     |
|--------------------------|--------------------------|---|-----------|----|-------------------------|----|-----------|-----|
|                          | Pegfilgrastim            |   | Placebo   |    | Pegfilgrastim           |    | Placebo   |     |
|                          | (n = 173)                |   | (n = 173) |    | (n = 173)               |    | (n = 173) |     |
|                          | n                        | % | n         | %  | n                       | %  | n         | %   |
| Neutropenia              |                          |   |           |    |                         |    |           |     |
| Grade 3                  | 7                        | 4 | 2         | 1  | 15                      | 9  | 0         | 0   |
| Grade 4                  | 3                        | 2 | 171       | 99 | 7                       | 4  | 173       | 100 |
| Leukopenia               |                          |   |           |    |                         |    |           |     |
| Grade 3                  | 3                        | 2 | 101       | 58 | 8                       | 5  | 86        | 50  |
| Grade 4                  | 1                        | 1 | 68        | 39 | 1                       | 1  | 86        | 50  |
| Lymphopenia              |                          |   |           |    |                         |    |           |     |
| Grade 3                  | 0                        | 0 | 5         | 3  | 36                      | 21 | 13        | 8   |
| Grade 4                  | 0                        | 0 | 0         | 0  | 9                       | 5  | 2         | 1   |

<sup>a</sup> Adverse events are graded according to the National Cancer Institute's Common Toxicity Criteria (version 4.0).
