# Supplementary material for: Phase III placebo-controlled, double-blind, randomized trial of pegfilgrastim to reduce the risk of febrile neutropenia in breast cancer patients receiving docetaxel/cyclophosphamide chemotherapy
Source: Springer Nature journal article supplement (doi:10.1007/s00520-014-2597-1), 2015-01-09
Supplement: MOESM2 [file 8575360]

Phase III placebo-controlled double-blind randomized trial of pegfilgrastim to reduce the risk of febrile neutropenia in breast cancer patients receiving docetaxel/cyclophosphamide chemotherapy

*Supportive Care in Cancer*

Y. Kosaka, Y. Rai, N. Masuda, T. Takano, T. Saeki, S. Nakamura, R. Shimazaki, Y. Ito, Y. Tokuda, K. Tamura

**Corresponding Author:** Yoshimasa Kosaka, Kitasato University School of Medicine, Sagamihara, Japan;

E-mail: y-kosaka@med.kitasato-u.ac.jp

**Online Resource 2** Summary of non-hematologic adverse events in the first cycle of chemotherapy

| Event <sup>a</sup>                    | All adverse events |      |           |      | Drug-related adverse events |      |           |      |
|---------------------------------------|--------------------|------|-----------|------|-----------------------------|------|-----------|------|
|                                       | Pegfilgrastim      |      | Placebo   |      | Pegfilgrastim               |      | Placebo   |      |
|                                       | (n = 173)          |      | (n = 173) |      | (n = 173)                   |      | (n = 173) |      |
|                                       | n                  | %    | n         | %    | n                           | %    | n         | %    |
| Alopecia                              | 153                | 88.4 | 152       | 87.9 | 0                           | 0    | 0         | 0    |
| Malaise                               | 87                 | 50.3 | 76        | 43.9 | 22                          | 12.7 | 16        | 9.2  |
| Arthralgia                            | 76                 | 43.9 | 61        | 35.3 | 43                          | 24.9 | 22        | 12.7 |
| Blood lactate dehydrogenase increased | 62                 | 35.8 | 4         | 2.3  | 48                          | 27.7 | 3         | 1.7  |
| Constipation                          | 60                 | 34.7 | 61        | 35.3 | 5                           | 2.9  | 7         | 4.0  |
| Dysgeusia                             | 57                 | 32.9 | 54        | 31.2 | 4                           | 2.3  | 4         | 2.3  |
| Myalgia                               | 54                 | 31.2 | 44        | 25.4 | 21                          | 12.1 | 14        | 8.1  |
| Diarrhea                              | 45                 | 26.0 | 43        | 24.9 | 6                           | 3.5  | 7         | 4.0  |
| Stomatitis                            | 43                 | 24.9 | 59        | 34.1 | 2                           | 1.2  | 7         | 4.0  |
| Decreased appetite                    | 40                 | 23.1 | 30        | 17.3 | 4                           | 2.3  | 2         | 1.2  |
| Nausea                                | 36                 | 20.8 | 40        | 23.1 | 5                           | 2.9  | 4         | 2.3  |
| Pyrexia                               | 36                 | 20.8 | 13        | 7.5  | 21                          | 12.1 | 3         | 1.7  |
| Back pain                             | 33                 | 19.1 | 26        | 15.0 | 25                          | 14.5 | 13        | 7.5  |
| Headache                              | 25                 | 14.5 | 23        | 13.3 | 13                          | 7.5  | 7         | 4.0  |
| Rash                                  | 25                 | 14.5 | 21        | 12.1 | 7                           | 4.0  | 8         | 4.6  |
| Eczema                                | 19                 | 11.0 | 12        | 6.9  | 6                           | 3.5  | 2         | 1.2  |

<sup>a</sup>Adverse events are listed using terminology from the Japanese version of the Medical Dictionary for Regulatory Activities (version 15.0).
